# Supplementary material for: Analysis of Pineapple Mealybug Wilt Associated Virus -1 and -2 for Potential RNA Silencing Suppressors and Pathogenicity Factors
Source: Viruses. 2015 Mar 5;7(3):969–95. doi: 10.3390/v7030969 (PMC4379557; doi:10.3390/v7030969)
Supplement: Supplementary File 1 [file viruses-07-00969-s001.pdf]

## Supplementary Materials

### Analysis of Pineapple Mealybug Wilt Associated Virus -1 and -2 for Potential RNA Silencing Suppressors and Pathogenicity Factors

Kishore K. Dey, Wayne B. Borth, Michael J. Melzer, Ming-Li Wang and John S. Hu

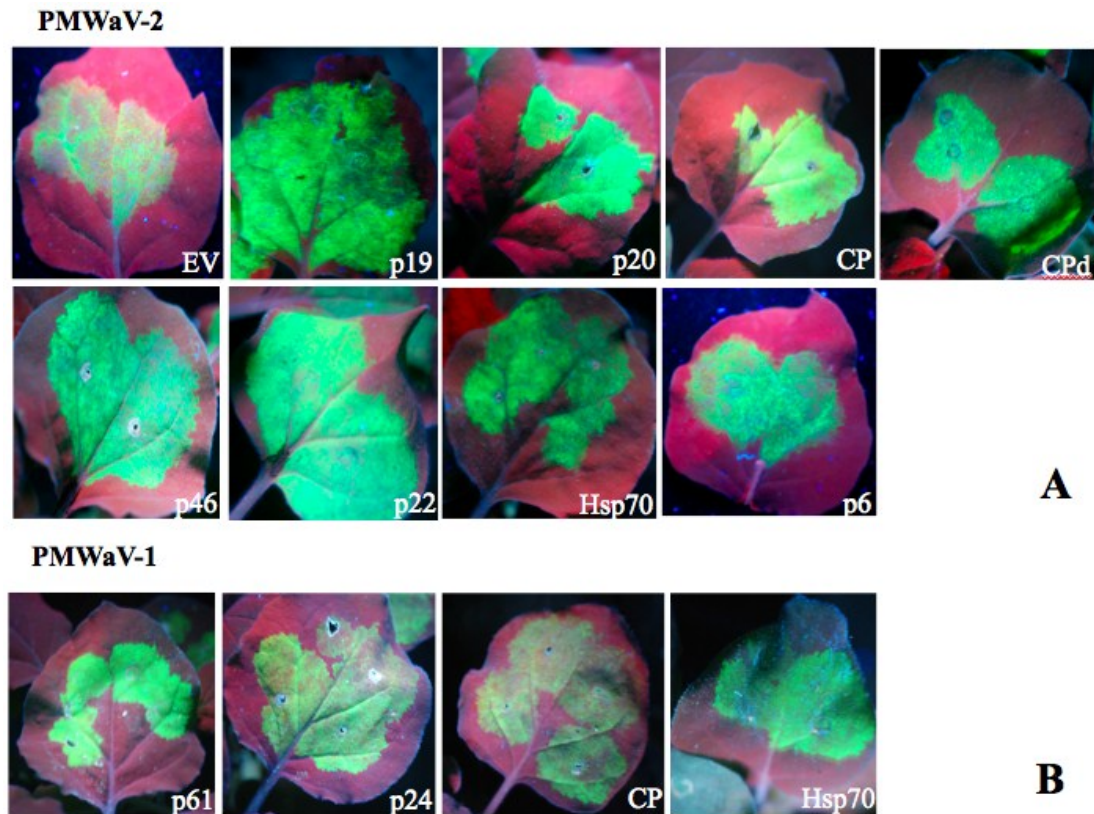

**Figure S1.** GFP fluorescence at 3 days post infiltration. WT. *N. benthamiana* plants were co-infiltrated with cultures of *Agrobacterium* carrying 35S-sGFP and *Agrobacterium* carrying individual PMWaV constructs. Infiltrated leaves were examined under short-wavelength UV light and photographed with a Nikon 5000 digital camera at 3 days post-infiltration (dpi). Leaves co-infiltrated with 35S-GFP and pBIC-35S-empty vector (EV) or 35S-GFP with *Tomato bushy stunt virus* (TBSV)-35S p19 were used as negative or positive controls respectively. (A) are PMWaV-2 constructs and (B) are PMWaV-1 constructs.

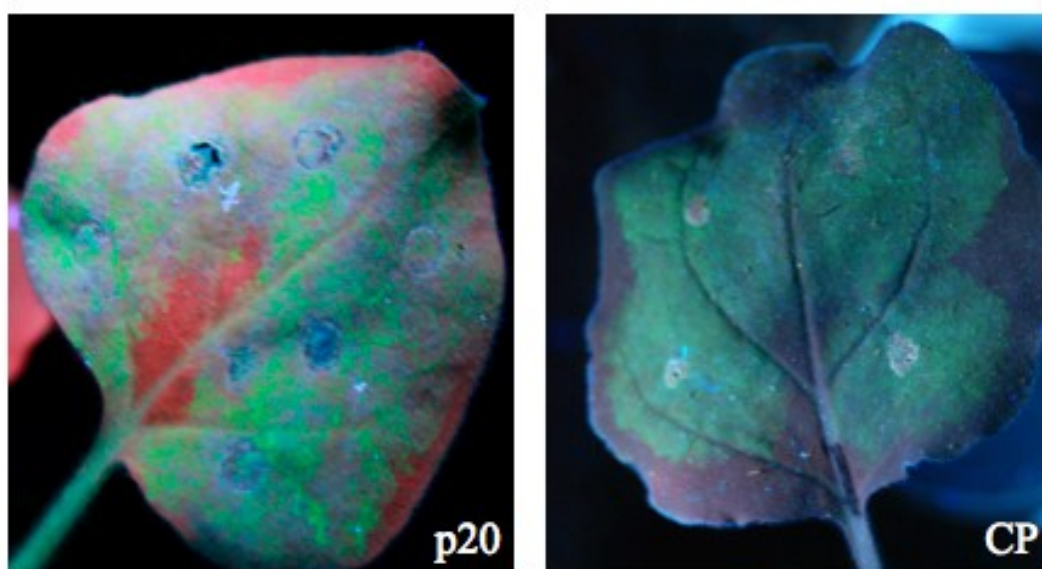

**Figure S2.** Decline of fluorescence by identified local suppressors. WT. *N. benthamiana* plants were co-infiltrated with cultures of *Agrobacterium* carrying 35S-sGFP and PMWaV-2 p20 and PMWaV-2 CP. Photograph shows decline of fluorescence produced by the two identified local suppressors, p20 and CP at 8 days post-infiltration (dpi). Infiltrated leaves were examined under short-wavelength UV light and photographed with a Nikon 5000 digital camera.

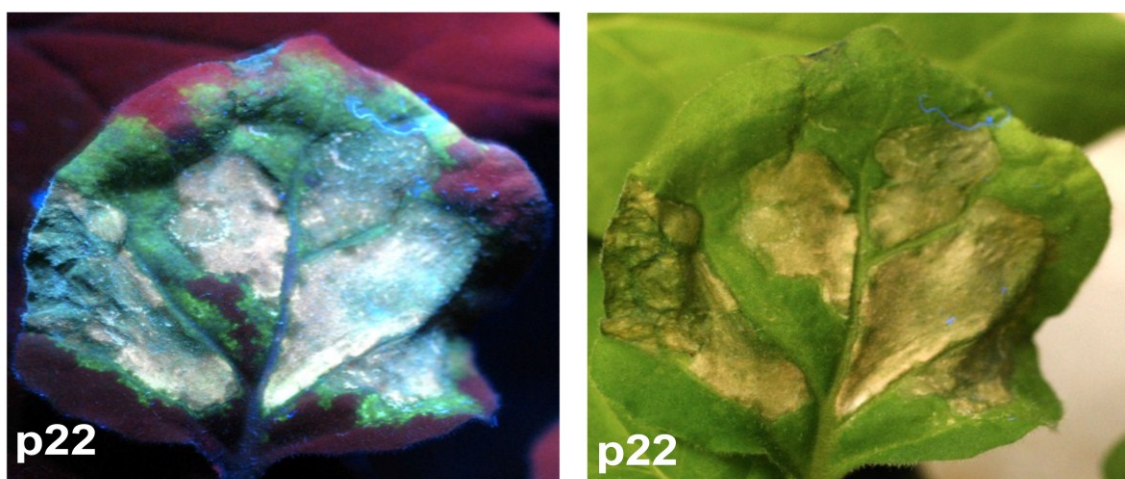

**Figure S3.** PMWaV-2-p22 showing necrosis. Leaves infiltrated with 35S-p22 and 35S-sGFP photographed under short-wavelength UV (Right panel) and under natural light (Left panel) show necrosis without local suppressor activity

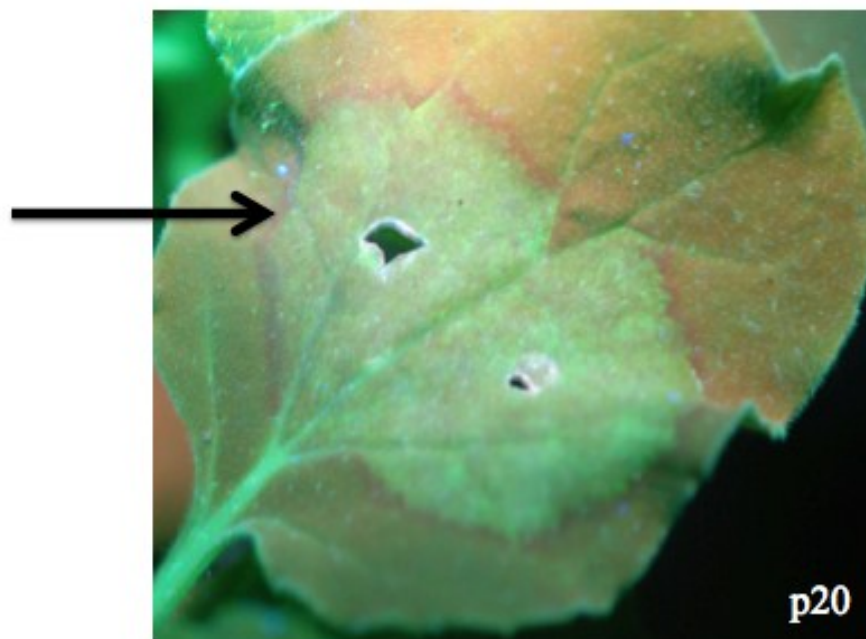

**Figure S4.** Formation of red zone due to short distance spread of GFP silencing by PMWaV-2 p20 at 12 days post infiltration. Leaves co-infiltrated with *A. tumefaciens* cultures harboring constructs pBI-35S-sGFP with PMWaV-2- p20. Photographs were taken at 12 dpi under short-wavelength UV light. Black arrow indicate the red zone that indicates short-distance spread of the mobile RNA silencing signal at the edge of the infiltrated patch.

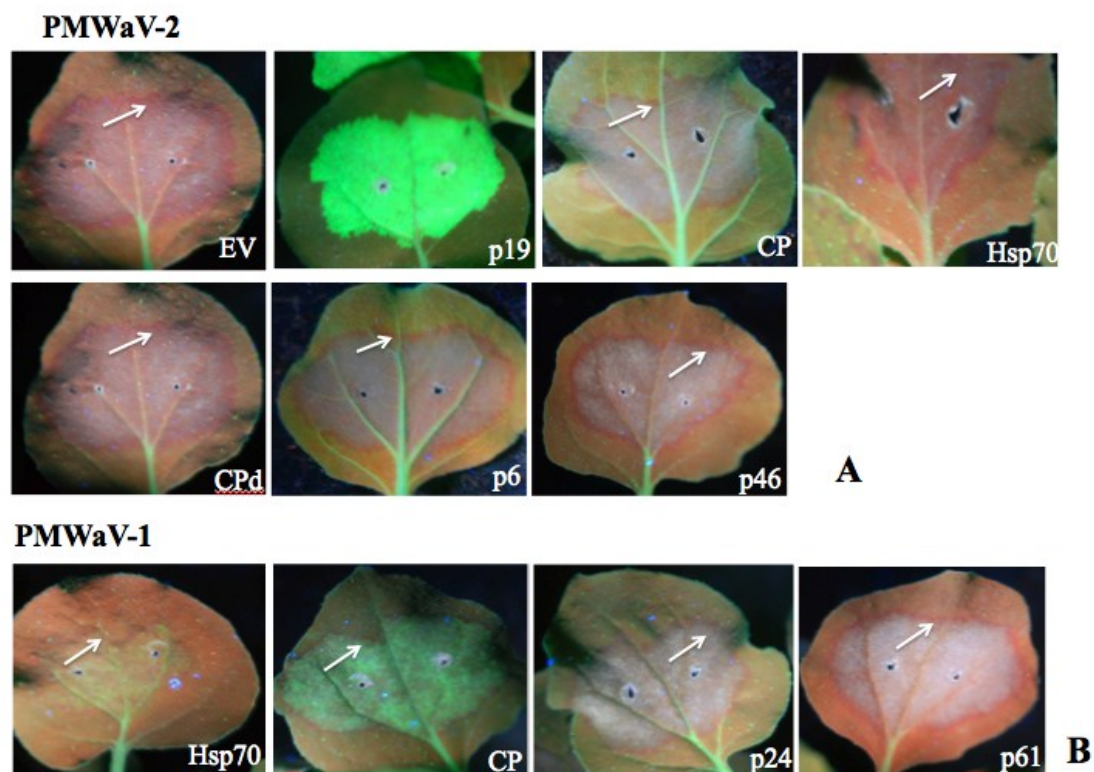

**Figure S5.** Effect of PMWaVs ORFs on the short distance spread (10–15 cells) of the GFP silencing signal in *N. benthamiana* 16C plants. **(A)** Leaves co-infiltrated with *A. tumefaciens* cultures harboring constructs pBI-35S-sGFP plus PMWaV-2 (CP, Hsp70, CPd, p6, p46), 35S-EV or 35S-p19 or **(B)** plus PMWaV-1 (Hsp70, CP, p24, p61). Photographs were taken at 8 dpi under short-wavelength UV light. White arrows indicate the red zone that indicates short-distance spread of the mobile RNA silencing signal at the edge of the infiltrated patch.

**Table S1.** Effect of PMWaVs ORFs on GFP-induced systemic silencing in transgenic *N. benthamiana* 16C plants. *Agrobacterium* carrying 35S-sGFP and individual PMWaV constructs were co-infiltrated with equal volumes of liquid bacterial cultures ( $OD^{600} = 1.0$ ). 35S-sGFP and pBIC-35S-empty vector (EV) or TBSV-35S-p19 were used as negative or positive controls, respectively. The leaves were examined under short-wavelength UV light at 4 weeks post infiltration. Suppression of systemic silencing was indicated by the lack of red fluorescence in upper non-inoculated leaves as shown in the figures in Table 2. Asterisks indicate significant differences in suppression efficiency between the individual constructs and the empty vector in Chi-square tests ( $p < 0.05$ ).

| Virus   | Gene/Construct | No. Plants Infiltrated | Suppression Efficiency (%) |
|---------|----------------|------------------------|----------------------------|
|         | pBIC Vector    | 61                     | 13                         |
| TBSV    | P19            | 45                     | 100*                       |
| PMWaV-2 | Hsp70          | 40                     | 15                         |
| PMWaV-2 | P46            | 55                     | 12                         |
| PMWaV-2 | CP             | 69                     | 71 *                       |
| PMWaV-2 | CPd            | 50                     | 19                         |
| PMWaV-2 | P20            | 63                     | 50 *                       |
| PMWaV-2 | P22            | 64                     | 25                         |
| PMWaV-2 | P6             | 45                     | 14                         |
| PMWaV-1 | Hsp70          | 50                     | 15                         |
| PMWaV-1 | P61            | 60                     | 17                         |
| PMWaV-1 | CP             | 55                     | 14                         |
| PMWaV-1 | P24            | 45                     | 12                         |

**Table S2.** Effect of PMWaVs ORFs on hairpin dsGFP-induced systemic silencing in transgenic *N. benthamiana* 16C plants. *Agrobacterium* carrying 35S-dsGFP and individual PMWaV constructs were co-infiltrated with equal volumes of liquid bacterial cultures ( $OD^{600} = 1.0$ ). 35S-dsGFP and pBIC-35S-empty vector (EV) or TBSV-35S-p19 were used as negative or positive controls, respectively. The leaves were examined under short-wavelength UV light at 7 days post infiltration. Suppression of systemic silencing was indicated by the lack of red fluorescence in upper non-inoculated leaves as shown in the figures in Table 2. Asterisks indicate significant differences in suppression efficiency between the individual constructs and the empty vector in Chi-square tests ( $p < 0.05$ ).

| Virus   | Gene/Construct | No. Plants Infiltrated | Suppression Efficiency (%) |
|---------|----------------|------------------------|----------------------------|
|         | pBIC Vector    | 20                     | 13                         |
| TBSV    | P19            | 20                     | 85*                        |
| PMWaV-2 | Hsp70          | 18                     | 15                         |
| PMWaV-2 | P46            | 20                     | 12                         |
| PMWaV-2 | CP             | 20                     | 10                         |
| PMWaV-2 | CPd            | 20                     | 19                         |
| PMWaV-2 | P20            | 20                     | 12                         |
| PMWaV-2 | P22            | 18                     | 11                         |
| PMWaV-2 | P6             | 18                     | 14                         |
| PMWaV-1 | Hsp70          | 18                     | 15                         |
| PMWaV-1 | P61            | 16                     | 17                         |
| PMWaV-1 | CP             | 18                     | 14                         |
| PMWaV-1 | P24            | 20                     | 12                         |
